# Supplementary material for: Selection on start codons in prokaryotes and potential compensatory nucleotide substitutions
Source: PubMed Central journal article supplement (PMC5622118; doi:10.1038/s41598-017-12619-6), 2017-09-29
Supplement: 41598_2017_12619_MOESM1_ESM.pdf [file 41598_2017_12619_MOESM1_ESM.pdf]

# **Selection on start codons in prokaryotes and potential compensatory nucleotide substitutions**

Frida Belinky<sup>1</sup>, Igor B. Rogozin<sup>1</sup>, Eugene V. Koonin<sup>1\*</sup>

<sup>1</sup>National Center for Biotechnology Information, National Library of Medicine, National Institutes of Health, Bethesda, Maryland, USA

**\*To whom correspondence should be addressed. Email: [koonin@ncbi.nlm.nih.gov](mailto:koonin@ncbi.nlm.nih.gov)**

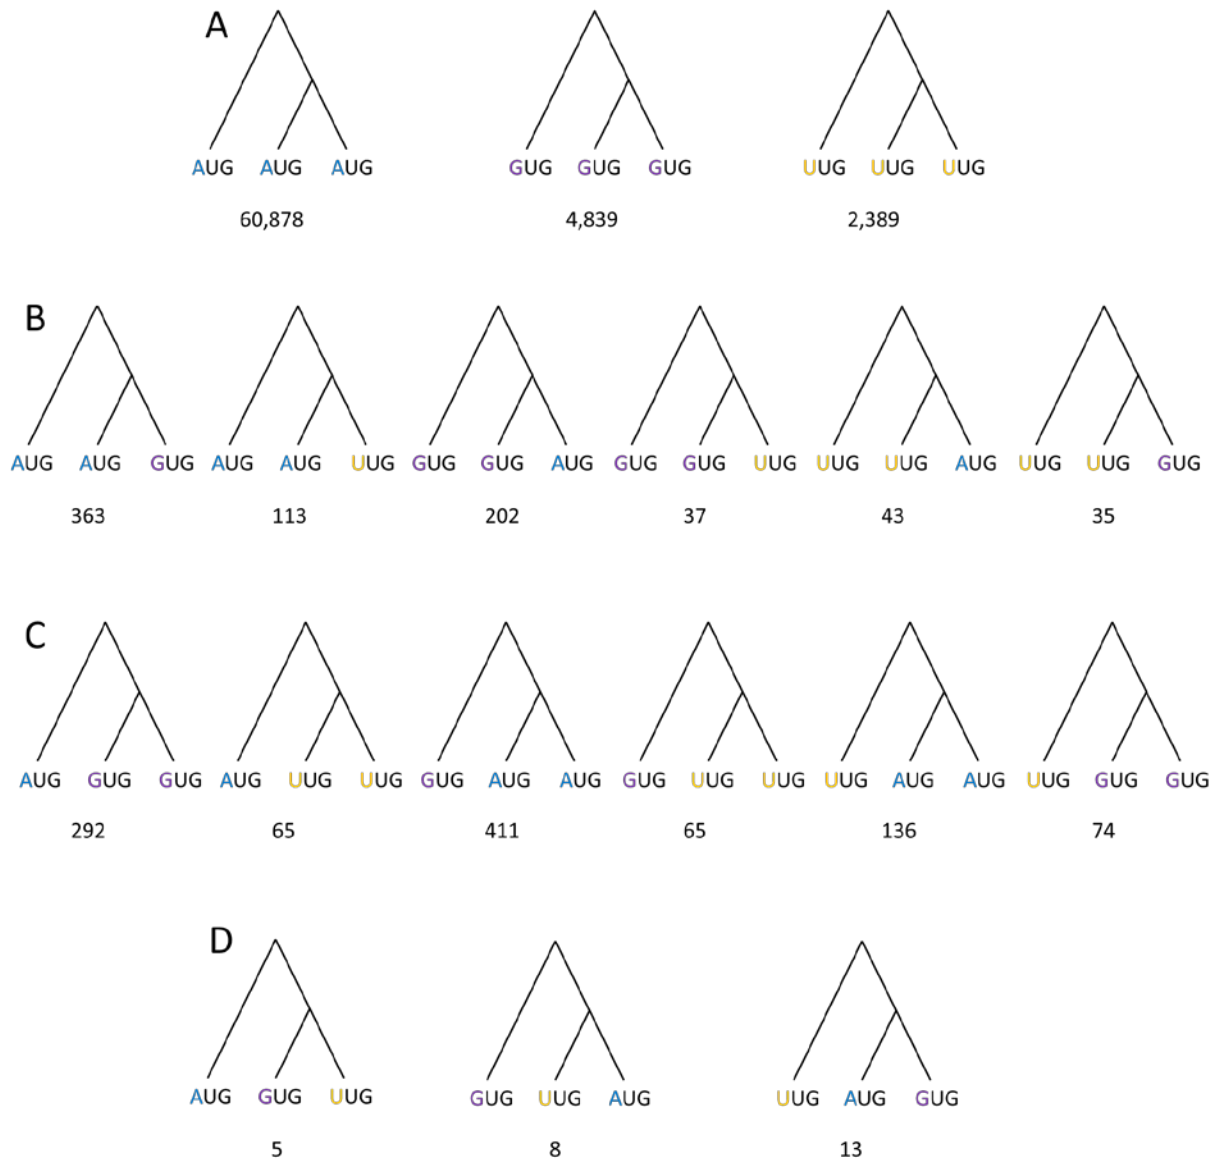

Figure S1. Configurations and gene counts for all start codon positions used for analyses of switch frequencies. Only configurations **A** and **B** were used to calculate switch frequencies limiting substitutions to the short external branch, under the parsimony assumption. **A** Identical start codon positions in all 3 related genomes. **B** configuration where one of the ingroup species has an identical start codon to the outgroup species. **C** Configurations where two ingroup species have an identical start codon and the outgroup species has a different one. **D** Configurations where all genomes have different start codons.

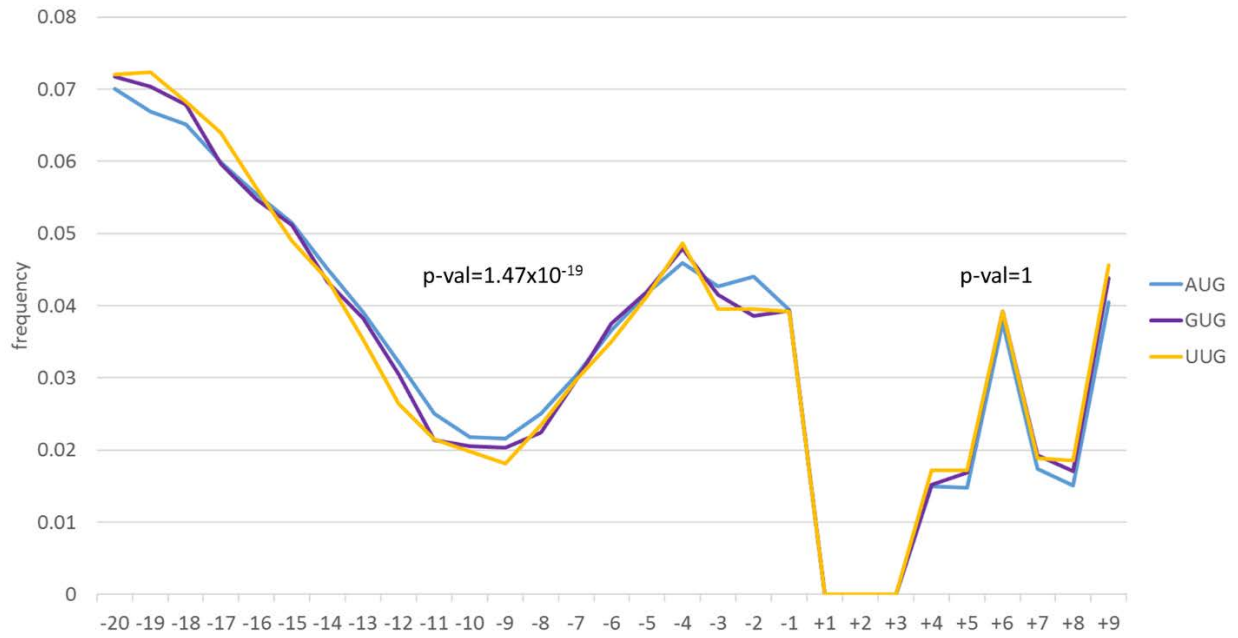

Figure S2. Cumulative substitution frequencies in 29 base pair windows. Based on pairwise comparison of closely related bacterial species with no more than 10 substitutions.

| A    | B    | C    | D    | E    | F    |
|------|------|------|------|------|------|
| +9   | +9   | +9   | +9   | +9   | +9   |
| +8   | +8   | +8   | +8   | +8   | +8   |
| +7   | +7   | +7   | +7   | +7   | +7   |
| +6   | +6   | +6 X | +6   | +6   | +6   |
| +5   | +5   | +5   | +5   | +5   | +5   |
| +4   | +4   | +4   | +4   | +4   | +4   |
| +3   | +3   | +3   | +3   | +3 X | +3   |
| +2   | +2   | +2   | +2   | +2   | +2   |
| +1 X | +1 X | +1 X | +1   | +1   | +1   |
| -1 X | -1   | -1   | -1 X | -1   | -1   |
| -2   | -2   | -2   | -2   | -2   | -2   |
| -3   | -3   | -3   | -3   | -3   | -3   |
| -4   | -4   | -4   | -4 X | -4   | -4 X |
| -5   | -5   | -5   | -5   | -5   | -5 X |
| -6   | -6   | -6   | -6   | -6   | -6   |
| -7   | -7   | -7   | -7   | -7   | -7   |
| -8   | -8   | -8   | -8   | -8   | -8   |
| -9   | -9 X | -9   | -9   | -9 X | -9   |
| -10  | -10  | -10  | -10  | -10  | -10  |
| -11  | -11  | -11  | -11  | -11  | -11  |
| -12  | -12  | -12  | -12  | -12  | -12  |
| -13  | -13  | -13  | -13  | -13  | -13  |
| -14  | -14  | -14  | -14  | -14  | -14  |
| -15  | -15  | -15  | -15  | -15  | -15  |
| -16  | -16  | -16  | -16  | -16  | -16  |
| -17  | -17  | -17  | -17  | -17  | -17  |
| -18  | -18  | -18  | -18  | -18  | -18  |
| -19  | -19  | -19  | -19  | -19  | -19  |
| -20  | -20  | -20  | -20  | -20  | -20  |

|                 | Substitutions at +1 and another at | Substitution at any but +1 and another at |
|-----------------|------------------------------------|-------------------------------------------|
| -1, -2, -3      | Example A                          | Example D                                 |
| -7, -8, -9, -10 | Example B                          | Example E                                 |
| Other positions | Example C                          | Example F                                 |

Figure S3.

Examples of substitution pairs (A – F) across ATGCs and genes.

Each example adds to the count of one of the table's entries.

All substitution pair counts are summed up in Table 2.

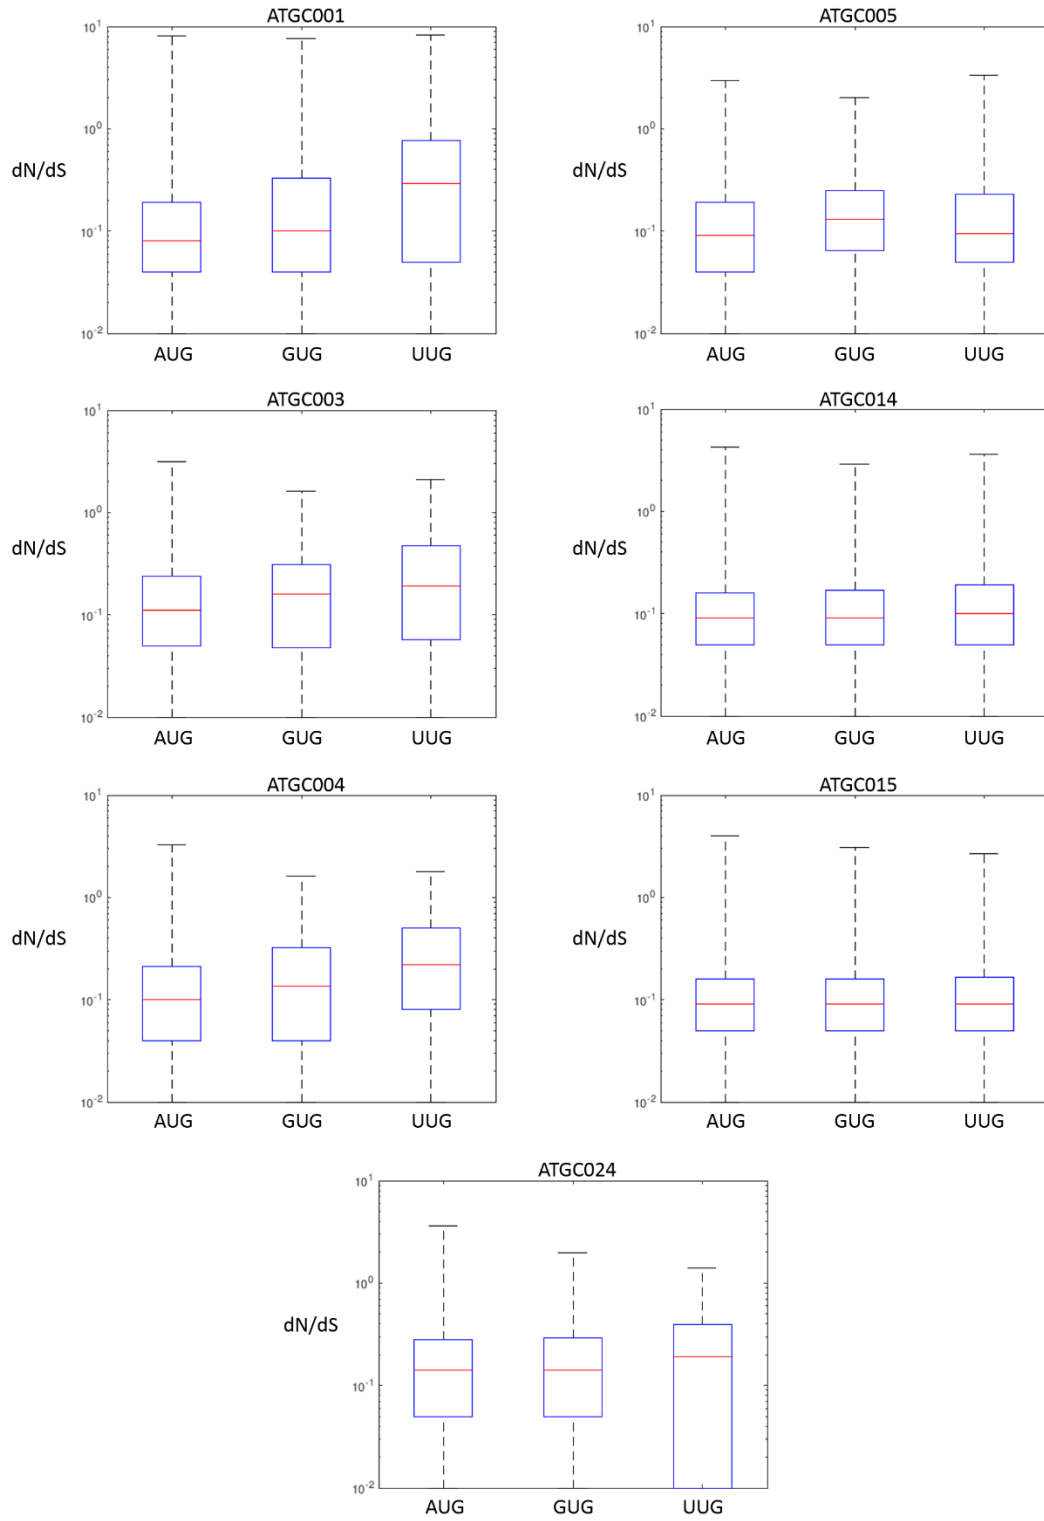

Figure S4 (part I)

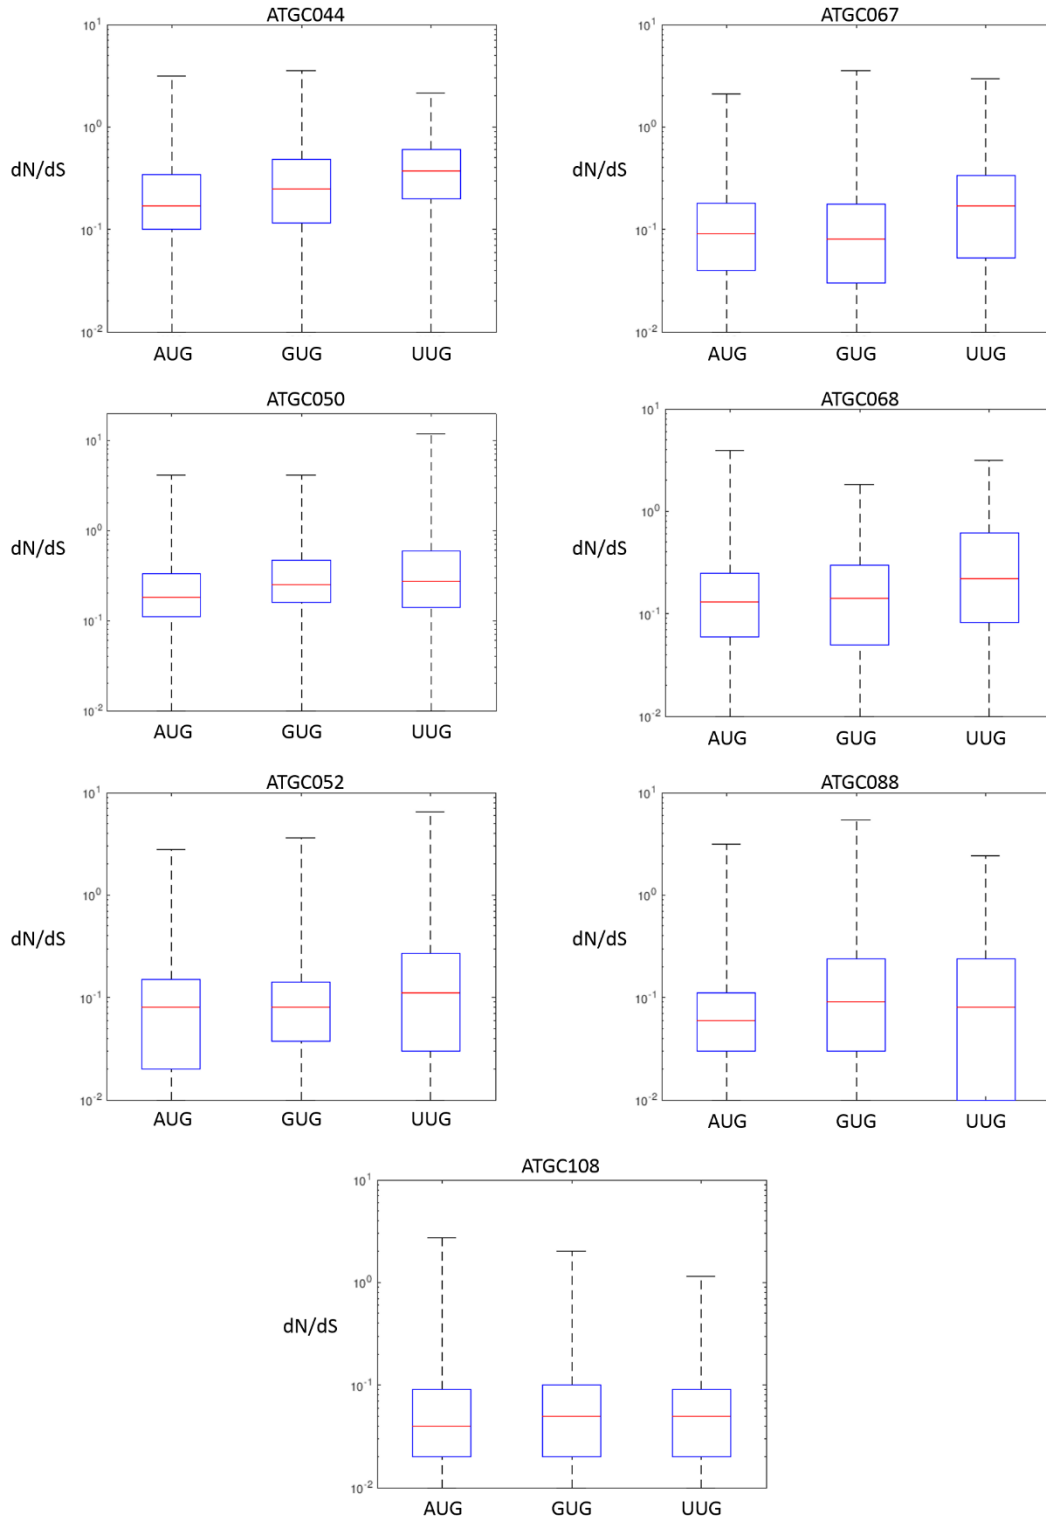

Figure S4 (part II)

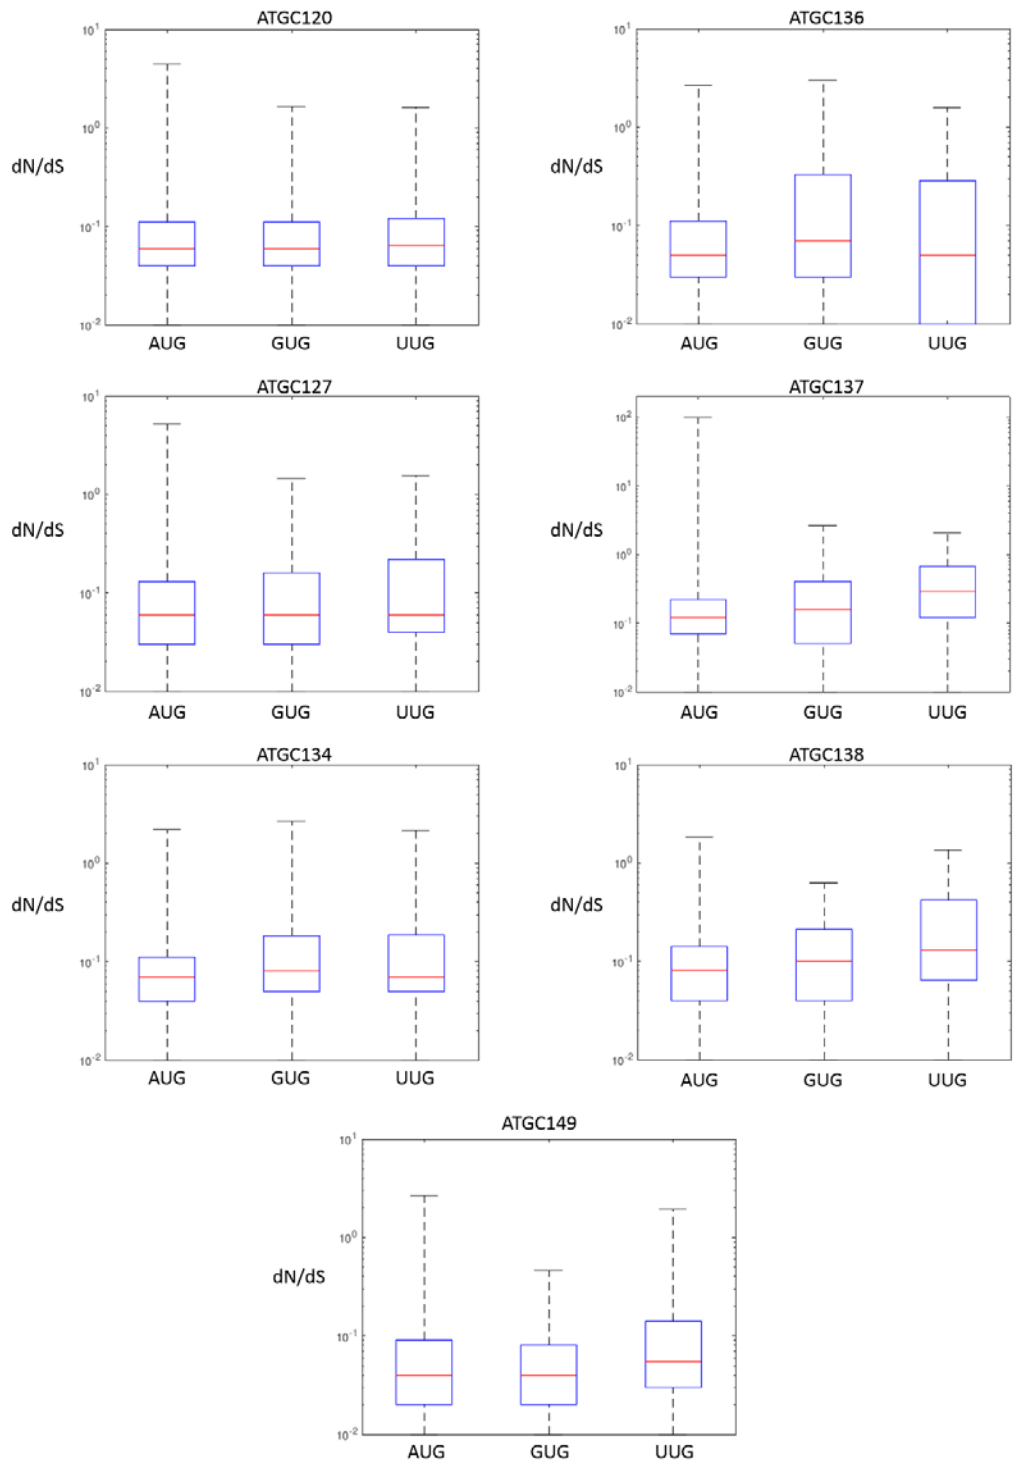

Figure S4. (part III). Evolutionary rates of genes starting with AUG, GUG and UUG in 21 ATGC groups with more than 12 species and more than 1,000 genes. The lower bound of all dN/dS values in all panels is zero. To enable presentation in log scale the lower bound was shifted to a finite value that was arbitrarily set to 0.01.

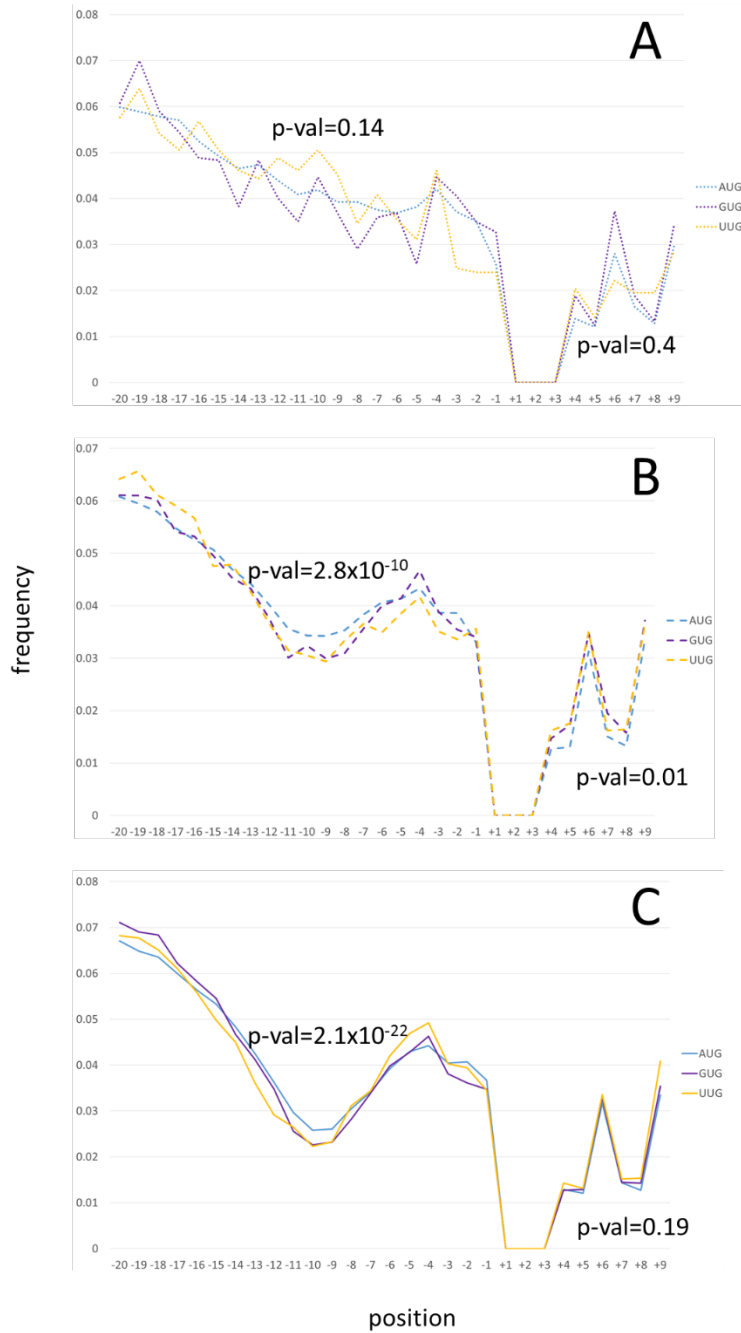

Figure S5. Cumulative substitution frequency grouped for different start codons and different strengths of Shine-Dalgarno. (A), no Shine-Dalgarno signal; (B), weak Shine-Dalgarno; (C), strong Shine-Dalgarno.



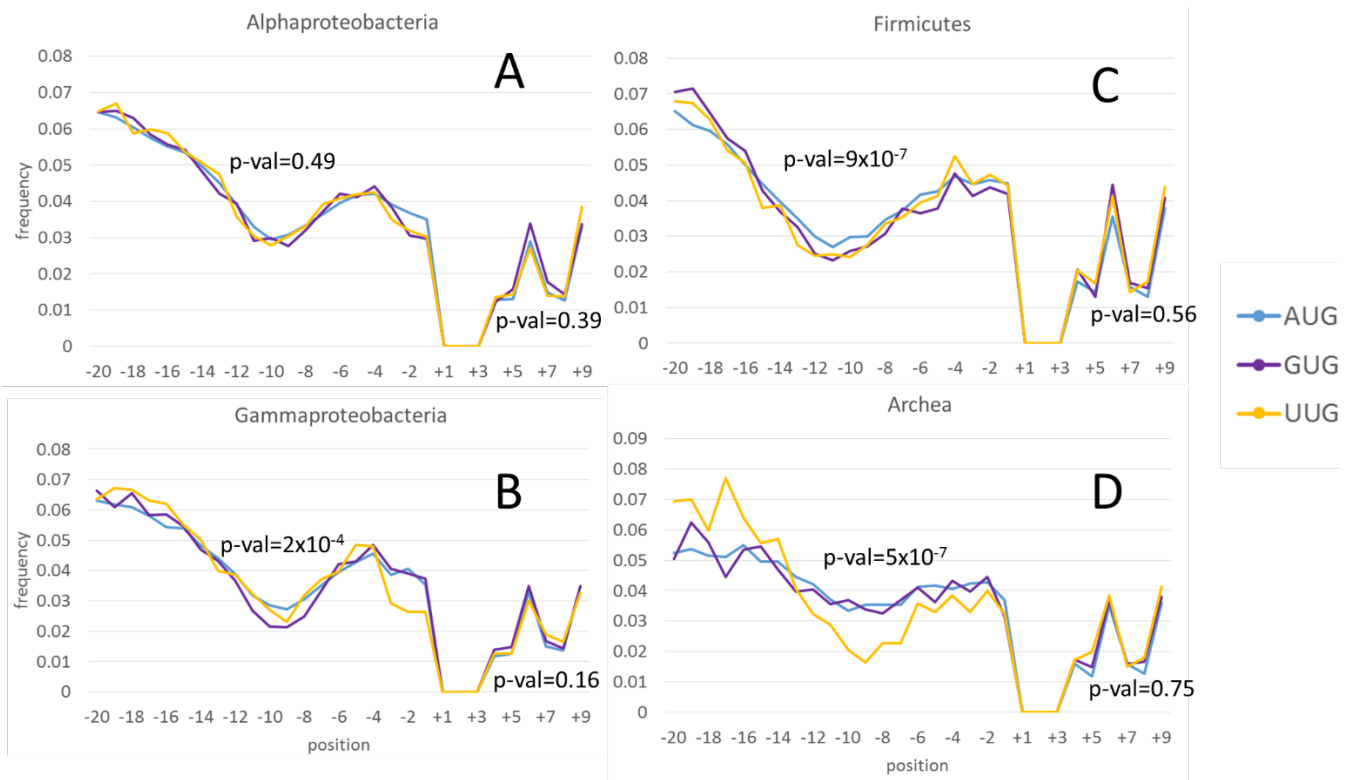

Figure S6. Cumulative substitution frequency grouped for different start codons in Alphaproteobacteria (A), Gammaproteobacteria (B), Firmicutes (C), and Archaea (D).

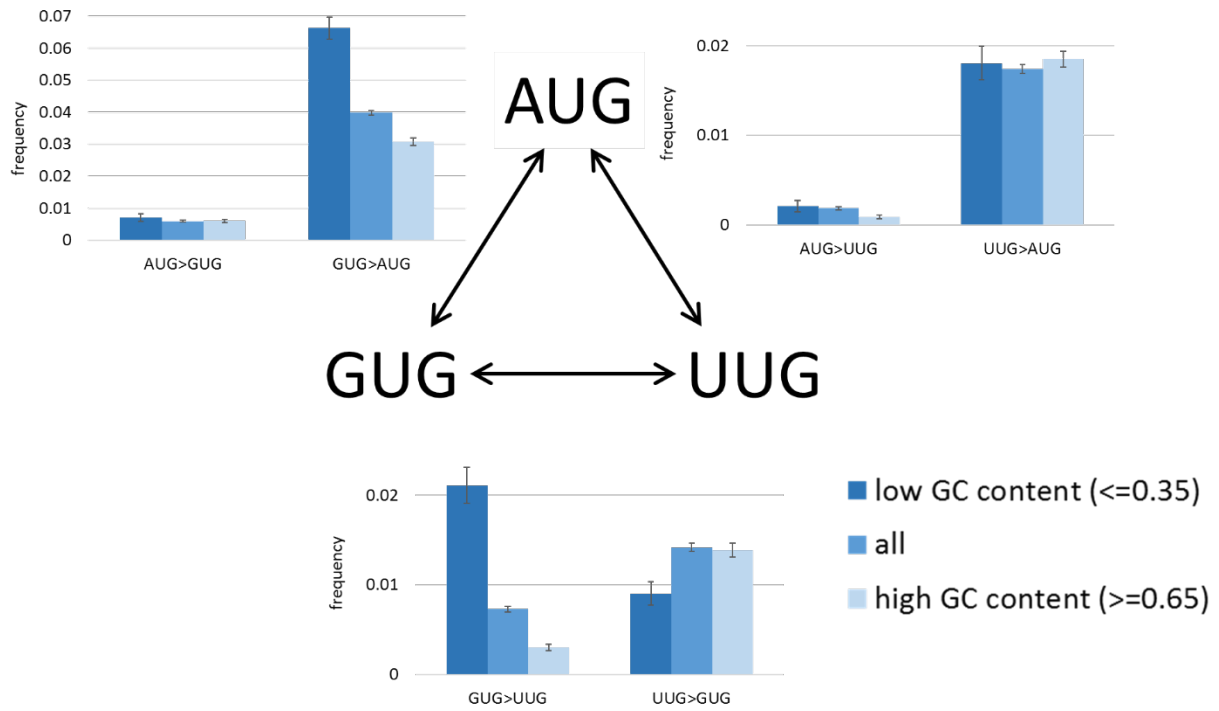

Figure S7. Switches between start-codons in 36 triples of prokaryotic genomes, compared between genes with low GC content ( $GC \leq 0.35$ ) and genes with high GC content ( $GC \geq 0.65$ ). The 'all' group includes additional taxa with  $0.35 < GC < 0.65$  and is therefore not always between the low and high GC groups.

Table S1. Counts and frequencies of start codon switches and ancestral start codon states after removal of genes with a conserved upstream start codon in the 60 upstream bases (denoted 'no upstream start'), compared to all genes included in the analysis (denoted 'all') and compared to counts and frequencies after removal of genes with conserved start codons in the 60 downstream bases (denoted 'no downstream start').

|               | no upstream start |           | all   |           | no downstream start |           |
|---------------|-------------------|-----------|-------|-----------|---------------------|-----------|
|               | count             | frequency | count | frequency | count               | frequency |
| UUG>GUG       | 32                | 0.014337  | 35    | 0.014182  | 21                  | 0.014103  |
| GUG>UUG       | 34                | 0.007055  | 37    | 0.007283  | 27                  | 0.008362  |
| UUG>AUG       | 41                | 0.018369  | 43    | 0.017423  | 36                  | 0.024177  |
| AUG>UUG       | 108               | 0.001888  | 113   | 0.001842  | 87                  | 0.002495  |
| GUG>AUG       | 196               | 0.040672  | 202   | 0.039764  | 143                 | 0.044286  |
| AUG>GUG       | 353               | 0.006171  | 363   | 0.005916  | 258                 | 0.007398  |
| ancestral AUG | 57200             | 0.890259  | 61358 | 0.890459  | 34873               | 0.880832  |
| ancestral GUG | 4819              | 0.075003  | 5080  | 0.073724  | 3229                | 0.081559  |
| ancestral UUG | 2232              | 0.034739  | 2468  | 0.035817  | 1489                | 0.03761   |

Table S2. Maximum Likelihood marginal probabilities for ancestral states of the different scenarios used for the switch frequency analyses of start codons. 'A' denotes AUG, 'G' denotes GUG and 'T' denotes UUG.

| Outgroup | ingroup1 | ingroup2 | Parsimony reconstructed ancestral state | FastML marginal probabilities |        |        |         | ML support for parsimony ancestral site |
|----------|----------|----------|-----------------------------------------|-------------------------------|--------|--------|---------|-----------------------------------------|
|          |          |          |                                         | A                             | C      | G      | T       |                                         |
| A        | A        | G        | A                                       | 0.942                         | 0.0002 | 0.057  | 0.00036 | 0.942                                   |
| A        | A        | U        | A                                       | 0.958                         | 0.0005 | 0.004  | 0.03728 | 0.958                                   |
| A        | U        | A        | A                                       | 0.962                         | 0.0005 | 0.004  | 0.03388 | 0.962                                   |
| A        | G        | A        | A                                       | 0.947                         | 0.0002 | 0.052  | 0.00035 | 0.947                                   |
| G        | G        | A        | G                                       | 0.0101                        | 0      | 0.9895 | 0.00041 | 0.9895                                  |
| G        | A        | G        | G                                       | 0.009                         | 0      | 0.9905 | 0.00039 | 0.9905                                  |
| G        | G        | U        | G                                       | 0.0001                        | 0      | 0.966  | 0.03391 | 0.966                                   |
| G        | U        | G        | G                                       | 0.0001                        | 0      | 0.969  | 0.03087 | 0.969                                   |
| U        | U        | A        | U                                       | 0.0028                        | 0      | 0.001  | 0.996   | 0.996                                   |
| U        | A        | U        | U                                       | 0.0025                        | 0      | 0.001  | 0.996   | 0.996                                   |
| U        | U        | G        | U                                       | 0                             | 0      | 0.016  | 0.984   | 0.984                                   |
| U        | G        | U        | U                                       | 0                             | 0      | 0.014  | 0.986   | 0.986                                   |

The marginal probabilities were estimated using FastML with the GTR substitution model.

Table S3. Original and sampled switch counts and frequencies for the 3 control groups in Fig. 1 and Table 1. Positions were sampled so the ancestral state frequencies would match those of the start codon ancestral frequencies. Although the ancestral states are varied in the sampled data compared to the original data, the switch frequencies remain the same.

| 4 fold degenerate site substitutions followed by UG | original count | original frequency | sampled mean count | sampled mean frequency | sample standard error of count** |
|-----------------------------------------------------|----------------|--------------------|--------------------|------------------------|----------------------------------|
| AUG>UUG                                             | 601            | 0.04254            | 601                | 0.04254                | 0                                |
| AUG>GUG                                             | 1564           | 0.11071            | 1564               | 0.11071                | 0                                |
| GUG>UUG                                             | 649            | 0.01947            | 24.479             | 0.01931                | 0.15218                          |
| UUG>GUG                                             | 573            | 0.03140            | 18.458             | 0.03160                | 0.14105                          |
| UUG>AUG                                             | 628            | 0.03441            | 20.276             | 0.03472                | 0.14450                          |
| GUG>AUG                                             | 2807           | 0.08421            | 106.304            | 0.08387                | 0.32523                          |
| Ancestral AUG                                       | 14127          | 0.21498            | 14127              | 0.88412                | 0                                |
| Ancestral UUG                                       | 18250          | 0.27772            | 584.061            | 0.03655                | 00.75868                         |
| Ancestral GUG                                       | 33335          | 0.50729            | 1267.514           | 0.07933                | 1.092198                         |
| Coding substitutions                                | original count | original frequency | sampled mean count | sampled mean frequency | sample standard error of count*  |
| AUG>UUG                                             | 1790           | 0.002708           | 1790               | 0.002708               | 0                                |
| AUG>GUG                                             | 2623           | 0.003968           | 2623               | 0.003968               | 0                                |
| GUG>UUG                                             | 1106           | 0.001508           | 83.2026            | 0.001512               | 5.03728                          |
| UUG>GUG                                             | 771            | 0.003794           | 101.5295           | 0.003814               | 0.29                             |
| UUG>AUG                                             | 948            | 0.004666           | 123.9428           | 0.004656               | 0.3294                           |
| GUG>AUG                                             | 3343           | 0.004559           | 250.6148           | 0.004556               | 0.4773                           |
| Ancestral AUG                                       | 660975         | 0.413752           | 660975             | 0.890083               | 0                                |
| Ancestral UUG                                       | 203189         | 0.127191           | 26617.5787         | 0.035844               | 5.0373                           |
| Ancestral GUG                                       | 733352         | 0.459058           | 55006.0762         | 0.074072               | 7.4338                           |
| Non-coding substitutions                            | original count | original frequency | sampled mean count | sampled mean frequency | sample standard error of count** |
| AUG>UUG                                             | 783            | 0.007855           | 783                | 0.007855               | 0                                |
| AUG>GUG                                             | 2273           | 0.022804           | 2273               | 0.022804               | 0                                |
| GUG>UUG                                             | 553            | 0.006505           | 53.6               | 0.006503               | 0.222                            |
| UUG>GUG                                             | 659            | 0.005612           | 22.54              | 0.005641               | 0.1486                           |
| UUG>AUG                                             | 722            | 0.006148           | 24.913             | 0.006235               | 0.1559                           |
| GUG>AUG                                             | 2370           | 0.027879           | 229.857            | 0.027887               | 0.4496                           |
| Ancestral AUG                                       | 99677          | 0.329936           | 99677              | 0.890648               | 0                                |
| Ancestral UUG                                       | 117423         | 0.388676           | 3995.685           | 0.035703               | 2.0006                           |
| Ancestral GUG                                       | 85010          | 0.281388           | 8242.515           | 0.07365                | 2.7694                           |

\* All AUG cases were included in all the samples, thus the standard error for all switches from AUG is zero, positions containing GUG and UUG were sampled to match the start codon frequencies.

Table S4. Comparison of the *dN/dS* values for genes starting with AUG, GUG and UUG in 21 ATGC groups. Wilcoxon rank sum test was performed on the *dN/dS* values of genes starting with different start codons in each group. Fisher's exact test was performed on the number of genes starting with each codon and having higher or lower *dN/dS* compared to the overall median in each ATGC group. The ATGC groups included are the ones that have more than 12 species and more than 1,000 total genes.

| ATGC group | # species | median <i>dN/dS</i> of genes starting with |      |      | Wilcoxon rank sum test |             |             | Fisher's exact test |             |             | # genes starting with |     |     |
|------------|-----------|--------------------------------------------|------|------|------------------------|-------------|-------------|---------------------|-------------|-------------|-----------------------|-----|-----|
|            |           | AUG                                        | GUG  | UUG  | AUG vs. GUG            | AUG vs. UUG | GUG vs. UUG | AUG vs. GUG         | AUG vs. UUG | GUG vs. UUG | AUG                   | GUG | UUG |
| ATGC001    | 109       | 0.08                                       | 0.1  | 0.29 | 2.7E-05                | 7.4E-20     | 8.8E-08     | 3.1E-03             | 1.6E-06     | 0.02        | 6119                  | 745 | 328 |
| ATGC003    | 22        | 0.11                                       | 0.16 | 0.19 | 0.12                   | 2.1E-03     | 0.32        | 0.05                | 0.06        | 0.88        | 1546                  | 77  | 101 |
| ATGC004    | 22        | 0.1                                        | 0.14 | 0.22 | 0.03                   | 6.2E-09     | 0.06        | 0.05                | 4.5E-05     | 0.26        | 1332                  | 80  | 108 |
| ATGC005    | 16        | 0.09                                       | 0.13 | 0.1  | 0.05                   | 0.36        | 0.41        | 0.01                | 0.76        | 0.13        | 1210                  | 48  | 50  |
| ATGC014    | 31        | 0.09                                       | 0.09 | 0.1  | 0.07                   | 1.4E-05     | 0.07        | 0.43                | 5.4E-04     | 0.06        | 5523                  | 623 | 654 |
| ATGC015    | 24        | 0.09                                       | 0.09 | 0.09 | 0.82                   | 0.52        | 0.79        | 0.50                | 0.93        | 0.70        | 3228                  | 468 | 572 |
| ATGC024    | 32        | 0.14                                       | 0.14 | 0.19 | 0.88                   | 0.31        | 0.33        | 0.55                | 0.29        | 0.19        | 1376                  | 754 | 100 |
| ATGC044    | 40        | 0.17                                       | 0.25 | 0.37 | 4.6E-03                | 5.9E-12     | 0.03        | 1.1E-03             | 5.4E-14     | 0.01        | 1231                  | 104 | 154 |
| ATGC050    | 51        | 0.18                                       | 0.25 | 0.27 | 1.7E-04                | 2.0E-08     | 0.54        | 1.9E-03             | 4.3E-06     | 0.91        | 1265                  | 121 | 239 |
| ATGC052    | 42        | 0.08                                       | 0.08 | 0.11 | 0.50                   | 6.5E-05     | 0.02        | 0.66                | 0.01        | 0.22        | 1859                  | 137 | 199 |
| ATGC067    | 18        | 0.09                                       | 0.08 | 0.17 | 0.20                   | 2.0E-03     | 1.7E-03     | 0.10                | 0.06        | 0.01        | 1208                  | 351 | 75  |
| ATGC068    | 13        | 0.13                                       | 0.14 | 0.22 | 0.15                   | 2.0E-04     | 9.2E-03     | 0.62                | 0.04        | 0.09        | 1100                  | 346 | 75  |
| ATGC088    | 13        | 0.06                                       | 0.09 | 0.08 | 3.7E-08                | 1.6E-03     | 0.47        | 0.16                | 0.16        | 0.75        | 4031                  | 496 | 250 |
| ATGC108    | 31        | 0.04                                       | 0.05 | 0.05 | 0.23                   | 0.35        | 0.75        | 0.40                | 0.40        | 1           | 1946                  | 206 | 258 |
| ATGC120    | 14        | 0.06                                       | 0.06 | 0.07 | 0.86                   | 0.30        | 0.45        | 0.75                | 0.52        | 0.74        | 3772                  | 343 | 156 |
| ATGC127    | 19        | 0.06                                       | 0.06 | 0.06 | 0.72                   | 0.41        | 0.56        | 0.47                | 0.90        | 0.89        | 2825                  | 239 | 78  |
| ATGC134    | 13        | 0.07                                       | 0.08 | 0.07 | 1.2E-07                | 0.02        | 0.65        | 1.7E-03             | 0.07        | 1           | 3164                  | 433 | 123 |
| ATGC136    | 19        | 0.05                                       | 0.07 | 0.05 | 0.16                   | 0.57        | 0.28        | 0.43                | 0.46        | 0.26        | 1190                  | 93  | 75  |
| ATGC137    | 18        | 0.12                                       | 0.16 | 0.29 | 0.04                   | 1.0E-09     | 0.03        | 0.13                | 2.4E-06     | 0.03        | 1720                  | 80  | 90  |
| ATGC138    | 18        | 0.08                                       | 0.1  | 0.13 | 0.09                   | 1.2E-03     | 0.19        | 0.10                | 2.6E-03     | 0.37        | 1240                  | 45  | 47  |
| ATGC149    | 14        | 0.04                                       | 0.04 | 0.06 | 0.04                   | 0.09        | 0.01        | 0.02                | 0.89        | 0.15        | 2972                  | 164 | 74  |

Table S5. Counts and ratios for combinations of start codon and start codon switches with Shine-Dalgarno strength and Shine-Dalgarno strength switches. Fisher's exact test was used to determine significance.

|     | strong | weak  | ratio    | p-val    |
|-----|--------|-------|----------|----------|
| AUG | 20597  | 12340 | 0.599116 | 5.53E-05 |
| GUG | 1631   | 818   | 0.501533 |          |

|     | strong | weak  | ratio    | p-val    |
|-----|--------|-------|----------|----------|
| AUG | 20597  | 12340 | 0.599116 | 1.64E-10 |
| UUG | 959    | 392   | 0.408759 |          |

|     | strong>weak | weak>strong | ratio    | p-val  |
|-----|-------------|-------------|----------|--------|
| AUG | 544         | 385         | 0.707721 | 0.1743 |
| GUG | 29          | 30          | 1.034483 |        |

|     | strong>weak | weak>strong | ratio    | p-val  |
|-----|-------------|-------------|----------|--------|
| AUG | 544         | 385         | 0.707721 | 0.6126 |
| UUG | 20          | 17          | 0.85     |        |

|         | strong | weak | ratio    | p-val  |
|---------|--------|------|----------|--------|
| AUG>GUG | 75     | 46   | 0.613333 | 0.4071 |
| GUG>AUG | 41     | 18   | 0.439024 |        |

|         | strong | weak | ratio    | p-val |
|---------|--------|------|----------|-------|
| AUG>UUG | 23     | 19   | 0.826087 | 1     |
| UUG>AUG | 10     | 8    | 0.8      |       |

|         | strong>weak | weak>strong | ratio  | p-val  |
|---------|-------------|-------------|--------|--------|
| AUG>GUG | 32          | 10          | 0.3125 | 0.1022 |
| GUG>AUG | 4           | 5           | 1.25   |        |

|         | strong>weak | weak>strong | ratio    | p-val |
|---------|-------------|-------------|----------|-------|
| AUG>UUG | 17          | 5           | 0.294118 | 1     |
| UUG>AUG | 11          | 3           | 0.272727 |       |

Table S6. Counts of major start codons in 36 genome triplets included in the switch analyses.

| ATGC    | outgroup | ingroup1 | ingroup2 | outgroup | ingroup1 | ingroup2 | outgroup | ingroup1 | ingroup2 |
|---------|----------|----------|----------|----------|----------|----------|----------|----------|----------|
|         | AUG      |          |          | GUG      |          |          | UUG      |          |          |
| ATGC001 | 1982     | 1982     | 1980     | 121      | 121      | 124      | 20       | 20       | 19       |
| ATGC003 | 1090     | 1087     | 1093     | 25       | 31       | 25       | 20       | 17       | 17       |
| ATGC008 | 847      | 857      | 858      | 45       | 43       | 43       | 43       | 35       | 34       |
| ATGC014 | 1847     | 1848     | 1854     | 165      | 161      | 156      | 130      | 133      | 132      |
| ATGC015 | 2001     | 1998     | 2005     | 193      | 194      | 185      | 250      | 251      | 254      |
| ATGC035 | 116      | 117      | 117      | 3        | 2        | 2        | 1        | 1        | 1        |
| ATGC044 | 249      | 250      | 248      | 18       | 17       | 19       | 3        | 2        | 3        |
| ATGC050 | 829      | 830      | 831      | 46       | 49       | 48       | 78       | 74       | 74       |
| ATGC071 | 3424     | 3423     | 3421     | 262      | 265      | 261      | 58       | 56       | 62       |
| ATGC088 | 2409     | 2413     | 2403     | 129      | 128      | 135      | 46       | 43       | 46       |
| ATGC089 | 3314     | 3312     | 3316     | 185      | 185      | 181      | 74       | 76       | 76       |
| ATGC097 | 1833     | 1834     | 1833     | 143      | 138      | 142      | 34       | 38       | 35       |
| ATGC100 | 2458     | 2452     | 2449     | 177      | 183      | 184      | 34       | 34       | 36       |
| ATGC104 | 791      | 800      | 797      | 92       | 84       | 85       | 21       | 20       | 22       |
| ATGC108 | 1835     | 1845     | 1835     | 165      | 163      | 173      | 202      | 194      | 194      |
| ATGC111 | 2060     | 2064     | 2062     | 110      | 111      | 113      | 44       | 39       | 39       |
| ATGC123 | 3369     | 3360     | 3366     | 217      | 220      | 219      | 119      | 125      | 120      |
| ATGC125 | 2862     | 2878     | 2876     | 180      | 167      | 168      | 92       | 89       | 89       |
| ATGC134 | 1522     | 1535     | 1535     | 143      | 135      | 138      | 33       | 28       | 25       |
| ATGC135 | 2492     | 2488     | 2486     | 223      | 222      | 224      | 37       | 42       | 42       |
| ATGC137 | 802      | 799      | 801      | 23       | 25       | 25       | 8        | 9        | 7        |
| ATGC144 | 551      | 552      | 552      | 41       | 39       | 40       | 79       | 81       | 80       |
| ATGC147 | 1222     | 1223     | 1223     | 52       | 53       | 53       | 104      | 101      | 102      |
| ATGC149 | 2023     | 2019     | 2021     | 109      | 111      | 110      | 21       | 23       | 22       |
| ATGC165 | 1872     | 1881     | 1879     | 138      | 133      | 135      | 58       | 54       | 54       |
| ATGC171 | 1087     | 1088     | 1097     | 132      | 132      | 128      | 130      | 129      | 124      |
| ATGC177 | 1113     | 1114     | 1114     | 114      | 113      | 114      | 138      | 138      | 137      |
| ATGC181 | 1167     | 1175     | 1165     | 135      | 141      | 144      | 205      | 193      | 200      |
| ATGC188 | 1866     | 1866     | 1866     | 79       | 76       | 80       | 32       | 35       | 31       |
| ATGC189 | 2994     | 3002     | 3001     | 158      | 164      | 161      | 52       | 40       | 44       |
| ATGC199 | 2302     | 2315     | 2310     | 228      | 218      | 217      | 238      | 235      | 239      |
| ATGC201 | 860      | 861      | 857      | 54       | 54       | 56       | 19       | 18       | 20       |
| ATGC210 | 739      | 736      | 735      | 69       | 74       | 74       | 70       | 68       | 69       |
| ATGC213 | 2325     | 2325     | 2326     | 318      | 319      | 315      | 94       | 93       | 96       |
| ATGC234 | 1077     | 1083     | 1089     | 534      | 526      | 524      | 23       | 24       | 21       |
| ATGC252 | 2390     | 2395     | 2396     | 738      | 735      | 734      | 81       | 79       | 79       |
